# Supplementary material
Source: Springer Nature journal article supplement (https://www.springermedizin.de/resource/supplementary/12884_2009_274_MOESM1_ESM.pdf/9457352)

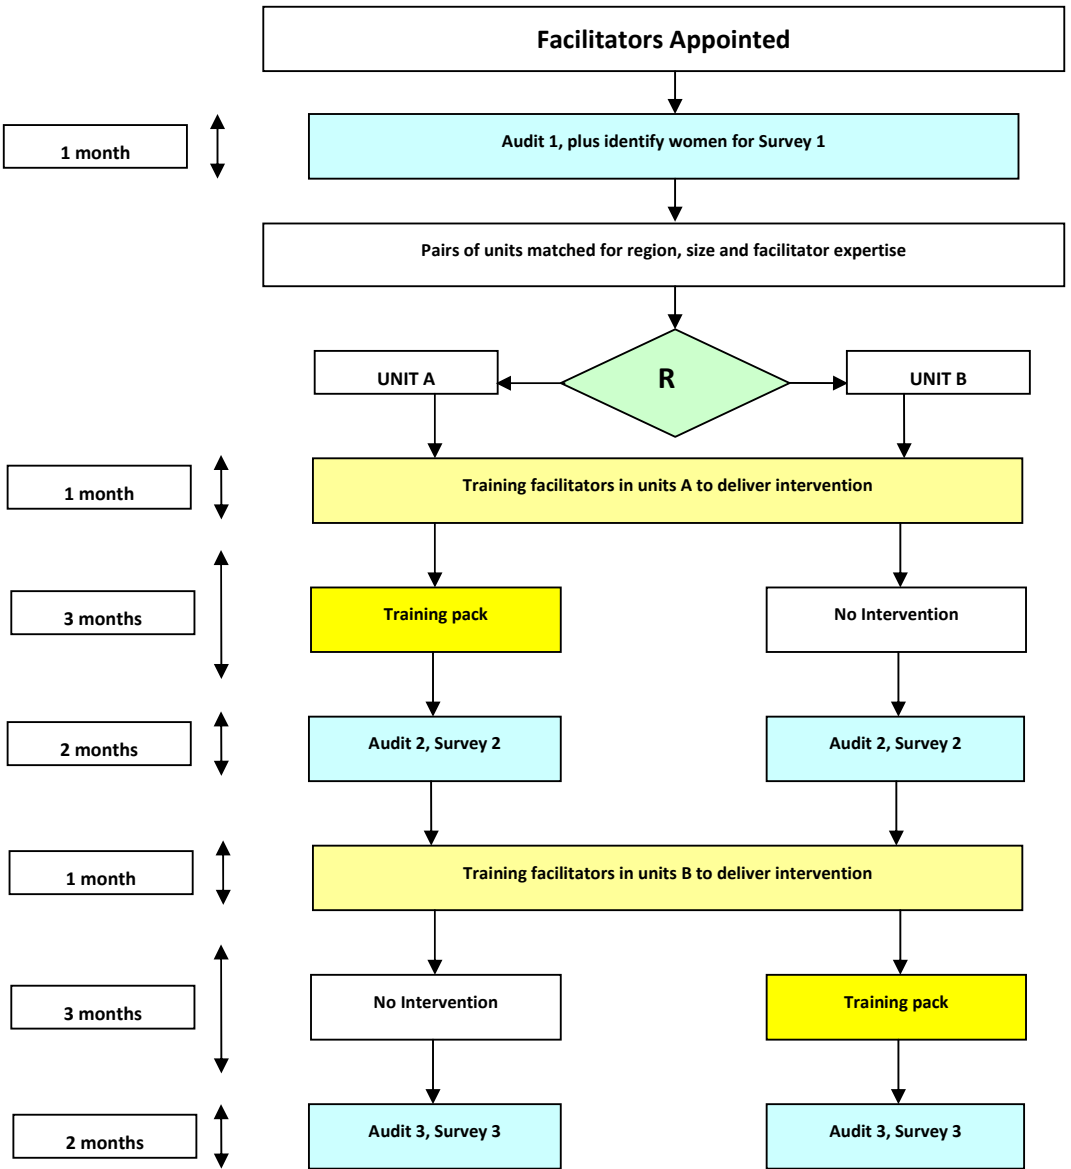

**R = Randomisation**

Supplement: MOESM1 [file 9457352]
